# Supplementary material for: A novel clean catalytic method for waste-free modification of polysaccharides by oxidation
Source: Royal Society of Chemistry journal article supplement (doi:10.1039/b411694a), 2004-01-01

**A novel clean catalytic method for waste-free modification of  
polysaccharides by oxidation**

Svetlana L. Kachkarova-Sorokina, Pierre Gallezot and Alexander B. Sorokin\*

***Supplementary Information***

**Experimental**

*Materials.* Potato native starch (gift from Raisio Chemicals, Finland) contained 80% amylose and 20% amylopectine on a dry basis and the moisture content was 16 wt%. Figure S1A gives a SEM image of native potato starch showing the presence of 5 – 50  $\mu\text{m}$  granules. Starches from rice, wheat, corn and corn starch enriched with amylopectin were obtained from Sigma. Hydrogen peroxide (35 %) was purchased from Aldrich. Metal complexes of tetrasulfonatophthalocyanine (MPcS) were prepared by a modified Weber-Busch procedure (S1,S2). ) Tetracarboxyphthalocyanine of iron was prepared by following the procedure reported in (S3).

*Methods.* The carbonyl and carboxyl degrees of substitution were determined by Smith's method (S4) using Titrino SM 702 apparatus. The Fe contents in modified starch were measured using inductively coupled plasma-mass spectrometry method. Water contents of materials were determined by TGA.

**References and Notes**

- S1. J.H. Weber, D.H. Busch, *Inorg. Chem.* **4**, 469 (1965).
- S2. A. Hadasch, A.B. Sorokin, A. Rabion, B. Meunier, *New J. Chem.*, **22**, 45 (1998).
- S3. H. Shirai, A. Maruyama, K. Kobayashi, N. Hojo, *Macromol. Chem.* **181**, 575 (1980).
- S4. P. Parovuori, A. Hamunen, P. Forssell, K. Autio, K. Poutanen, *Starch/Stärke* **47**, 19 (1995).

Table S1. Oxidation of starches from different sources by the dry method at 58°C.

| Origin of the starch | Amylose % | Amylopectin % | Granule size $\mu\text{m}$ | $T_{\text{gelatin}}$ °C | COOH per 100 GU | CO    |
|----------------------|-----------|---------------|----------------------------|-------------------------|-----------------|-------|
| Potato               | 20        | 80            | 5 – 100                    | 50-68                   | 4.0             | 8.0   |
| Corn                 | 27        | 73            | 5 – 30                     | 62-80                   | 3.6             | 6.0   |
| Corn                 | 0         | 100           | 5 – 30                     | 63-72                   | 3.65*           | 6.2*  |
| Rice                 | 19        | 81            | 1 – 3                      | 66-78                   | 3.1             | 6.1   |
| Wheat                | 25        | 75            | 1 – 45                     | 52-85                   | 4.3*            | 5.85* |
|                      |           |               |                            |                         | 1.5             | 3.6   |
|                      |           |               |                            |                         | 2.9*            | 6.3*  |
|                      |           |               |                            |                         | 3.5             | 6.1   |

\* - 70°C, molar ratio catalyst :  $\text{H}_2\text{O}_2$  : AGU = 1 : 1450 : 6500.

Fig. S1. Structure of iron tetrasulfonatophthalocyanine (one of four possible positional isomer is shown).

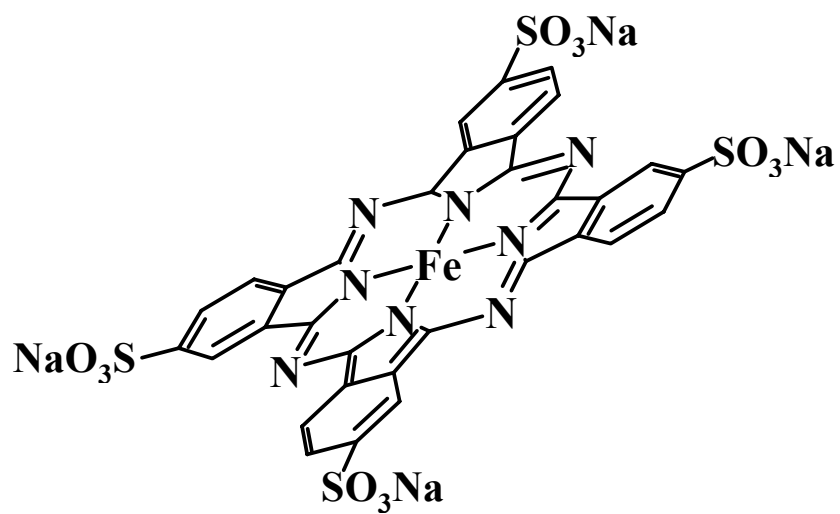

Figure S2. SEM pictures of native potato starch (A) ; oxidised potato starch having  $DS_{CO} = 2.84$ ,  $DS_{COOH} = 0.27$  (B) and oxidised potato starch having  $DS_{CO} = 8.50$ ,  $DS_{COOH} = 4.60$  (C).

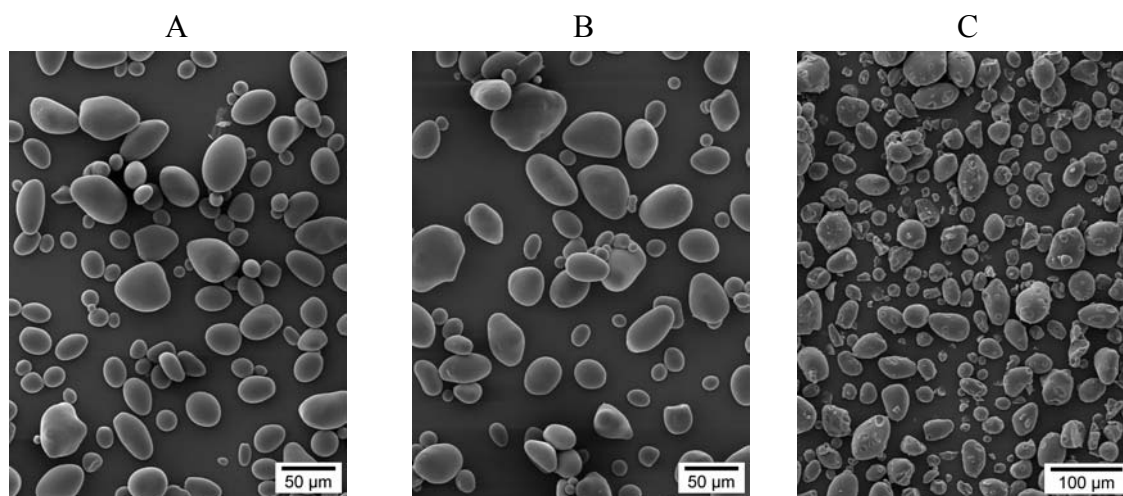

Supplement: b411694a.pdf [file b411694a.pdf]
